# Supplementary material
Source: PubMed Central journal article supplement (PMC9556822)
Supplement: 41467_2022_33801_MOESM1_ESM.pdf [file 41467_2022_33801_MOESM1_ESM.pdf]

**Clinical phenotypes and outcomes associated with SARS-CoV-2 variant Omicron, sublineages BA.1, BA.1.1, BA.2 in critically ill French patients with COVID-19**

**Author list**

Nicolas de Prost, Etienne Audureau, Nicholas Heming, Elyanne Gault, Tàì Pham, Amal Chaghouri, Nina de Montmollin, Guillaume Voiriot, Laurence Morand-Joubert, Adrien Joseph, Marie-Laure Chaix, Sébastien Préau, Raphaël Favory, Aurélie Guigon, Charles-Edouard Luyt, Sonia Burrel, Julien Mayaux, Stéphane Marot, Damien Roux, Diane Descamps, Sylvie Meireles, Frédéric Pène, Flore Rozenberg, Damien Contou, Amandine Henry, Stéphane Gaudry, Ségolène Brichler, Jean-François Timsit, Antoine Kimmoun, Cédric Hartard, Louise-Marie Jandeau, Samira Fafi-Kremer, Paul Gabarre, Malo Emery, Claudio Garcia-Sanchez, Sébastien Jochmans, Aurélie Pitsch, Djillali Annane, Elie Azoulay, Armand Mekontso Dessap, Christophe Rodriguez , Jean-Michel Pawlotsky, Slim Fourati

**Supplementary Information**

**Content**

Supplementary Table 1.....Page 2  
Supplementary Table 2.....Page 4  
Supplementary Table 3.....Page 6  
Supplementary Table 4.....Page 7

**Supplementary Table 1.** Association of variables available within 24 hours of ICU admission and day-28 mortality by univariable logistic regression analysis in patients with Delta and Omicron infection

|                                                                     | Day-28 survivors<br>N=175   | Day-28 non-survivors<br>N=84 | OR (CI95%)       | p-value           |
|---------------------------------------------------------------------|-----------------------------|------------------------------|------------------|-------------------|
| <b>Demographics and comorbidities</b>                               |                             |                              |                  |                   |
| Sex, females                                                        | 58 (33.14%)                 | 24 (28.57%)                  | 0.81 (0.46;1.42) | 0.459             |
| Age, years                                                          | 58.53 (±12.73)              | 66.70 (±11.30)               | 1.06 (1.04;1.09) | <b>&lt;0.0001</b> |
| Diabetes                                                            | 51 (29.14%)                 | 35 (42.68%)                  | 1.81 (1.05;3.12) | <b>0.033</b>      |
| Obesity                                                             | 71 (41.04%)                 | 28 (33.33%)                  | 0.72 (0.42;1.24) | 0.235             |
| Chronic heart failure                                               | 8 (4.57%)                   | 13 (15.66%)                  | 3.88 (1.54;9.77) | <b>0.004</b>      |
| Hypertension                                                        | 71 (40.57%)                 | 47 (56.63%)                  | 1.91 (1.13;3.24) | <b>0.016</b>      |
| Chronic respiratory failure                                         | 14 (8.00%)                  | 9 (10.84%)                   | 1.40 (0.58;3.38) | 0.456             |
| Chronic renal failure                                               | 23 (13.22%)                 | 23 (28.05%)                  | 2.56 (1.33;4.91) | <b>0.005</b>      |
| Cirrhosis                                                           | 3 (1.71%)                   | 1 (1.20%)                    | 0.70 (0.07;6.82) | 0.758             |
| Immunosuppression                                                   | 43 (24.57%)                 | 36 (43.37%)                  | 2.35 (1.35;4.09) | <b>0.002</b>      |
| Immunosuppression (3 cat.)                                          | None                        | 47 (56.63%)                  | 1(ref)           | <b>0.027</b>      |
|                                                                     | Solid organ transplant      | 18 (21.69%)                  | 2.30 (1.13;4.66) | <b>0.021</b>      |
|                                                                     | Onco-hematological malignar | 10 (6.29%)                   | 2.55 (1.02;6.40) | <b>0.046</b>      |
|                                                                     | Others <sup>a</sup>         | 10 (5.71%)                   | 2.25 (0.84;6.03) | 0.108             |
| Number of comorbidities                                             | 1 (1;2)                     | 2 (1;3)                      | 1.41 (1.16;1.70) | <b>0.0004</b>     |
| Clinical frailty scale                                              | 3 (2;3)                     | 3 (3;4)                      | 1.30 (1.09;1.55) | <b>0.003</b>      |
| <b>SARS-CoV-2 infection and Vaccination</b>                         |                             |                              |                  |                   |
| Clade                                                               | Delta                       | 32 (38.10%)                  | 1(ref)           | 0.284             |
|                                                                     | Omicron                     | 96 (54.86%)                  | 1.34 (0.79;2.28) | 0.284             |
| Previous SARS-CoV-2 infection                                       | 13 (7.47%)                  | 3 (3.61%)                    | 0.46 (0.13;1.68) | 0.242             |
| SARS-CoV-2 vaccination (binaire)                                    | 70 (40.23%)                 | 51 (60.71%)                  | 2.30 (1.35;3.91) | <b>0.002</b>      |
| Number of doses among vaccinated                                    | 3 (2;3)                     | 3 (2;3)                      | 0.81 (0.45;1.48) | 0.494             |
| 1st dose - ICU admission <sup>b</sup> , days                        | 24 (17;62)                  | 159 (11;307)                 | 1.01 (0.99;1.04) | 0.360             |
| 2nd dose - ICU admission <sup>b</sup> , days                        | 157 (57;211)                | 174 (120;241)                | 1.00 (0.99;1.01) | 0.388             |
| 3rd dose - ICU admission <sup>b</sup> , days                        | 140 (34;217)                | 100 (46;179)                 | 1.00 (0.99;1.01) | 0.570             |
| Last dose - ICU admission <sup>b</sup> , days                       | 131.50 (34;214)             | 135 (48;202)                 | 1.00 (1.00;1.00) | 0.910             |
| SARS-CoV-2 serology at ICU a                                        | Unavailable                 | 31 (36.90%)                  | 1(ref)           | 0.334             |
|                                                                     | Negative                    | 57 (32.57%)                  | 1.25 (0.68;2.29) | 0.467             |
|                                                                     | Positive                    | 53 (30.29%)                  | 0.75 (0.38;1.48) | 0.408             |
| First symptoms - ICU admission, days                                | 9 (6;11)                    | 7.50 (5;10)                  | 0.98 (0.93;1.03) | 0.478             |
| SARS-CoV-2 RNA detection in nasopharyngeal swabs, Ct                | 24 (20.50;27.50)            | 20 (18;23)                   | 0.82 (0.75;0.90) | <b>&lt;0.0001</b> |
| <b>Patients severity upon ICU admission and biological features</b> |                             |                              |                  |                   |
| WHO 10-point scale                                                  | 6 (6;6)                     | 6 (6;8)                      | 1.17 (0.91;1.50) | 0.210             |
| SAPS II score                                                       | 31 (24;39)                  | 40 (31;51)                   | 1.05 (1.03;1.08) | <b>&lt;0.0001</b> |
| SOFA score                                                          | 4 (2;5)                     | 5 (3.50;7)                   | 1.21 (1.09;1.34) | <b>0.0003</b>     |
| PaO <sub>2</sub> /FiO <sub>2</sub> ratio, mmHg                      | 124 (80;178)                | 85 (64;133)                  | 1.00 (0.99;1.00) | 0.066             |
| Arterial lactate level, mM                                          | 1.50 (1.10;2.10)            | 1.90 (1.15;2.40)             | 1.05 (0.92;1.19) | 0.467             |
| Blood leukocytes, G/L                                               | 8.35 (5.60;12.50)           | 8.00 (4.65;11.65)            | 1.01 (0.97;1.04) | 0.728             |
| Blood lymphocytes, G/L                                              | 0.60 (0.40;0.90)            | 0.40 (0.20;0.70)             | 1.02 (0.96;1.08) | 0.527             |
| Blood platelets, G/L                                                | 239.50 (180;316)            | 179 (128;254)                | 0.99 (0.99;1.00) | <b>&lt;0.0001</b> |
| Serum urea level, mM                                                | 7 (5;12)                    | 12 (7.50;19.5)               | 1.06 (1.03;1.09) | <b>0.0001</b>     |
| Serum creatinine level, µM                                          | 75 (59;110)                 | 107 (70;166.5)               | 1.00 (1.00;1.01) | <b>0.006</b>      |
| Bacterial coinfection                                               | 23 (13.14%)                 | 13 (15.48%)                  | 1.21 (0.58;2.53) | 0.612             |
| Pulmonary embolism                                                  | 11 (6.51%)                  | 5 (5.95%)                    | 0.91 (0.31;2.71) | 0.864             |
| Lung parenchyma involvement, %                                      | 50 (50;75)                  | 50 (40;75)                   | 1.01 (0.99;1.02) | 0.470             |
| Oxygen/ventilatory support                                          | Oxygen                      | 34 (19.43%)                  | 10 (11.90%)      | 1(ref)            |
|                                                                     | High flow oxygen            | 90 (51.43%)                  | 43 (51.19%)      | 1.62 (0.73;3.59)  |
|                                                                     | NIV/C-PAP                   | 13 (7.43%)                   | 8 (9.52%)        | 2.09 (0.68;6.47)  |
|                                                                     | Invasive MV                 | 38 (21.71%)                  | 23 (27.38%)      | 2.06 (0.86;4.94)  |
| ECMO                                                                | 9 (5.20%)                   | 2 (2.38%)                    | 0.44 (0.09;2.10) | 0.307             |
| Vasopressor support                                                 | 18 (10.71%)                 | 15 (18.07%)                  | 1.84 (0.87;3.86) | 0.108             |

Results are N (%), means (±standard deviation) or medians (interquartile range, i.e., quartile 1;quartile 3). <sup>a</sup>includes HIV infection, long-term corticosteroid treatment, and other immunosuppressive treatments; <sup>b</sup>time lag between the last vaccination dose and ICU admission; <sup>c</sup>defined as < 30 Binding Antibody Units (BAU)/mL; ICU: intensive care unit; Ct: cycle threshold; WHO: World Health Organization; SOFA: Sequential Organ Failure Assessment; SAPS II: Simplified Acute Physiology Score II; NIV: non-invasive ventilation; C-PAP; Continuous-positive airway pressure; MV: mechanical ventilation; ECMO:

extracorporeal mechanical ventilation; Two-tailed p-values come from unadjusted comparisons using Chi square or Fisher's exact tests for categorical variables, and t-tests or Mann-Whitney tests for continuous variables, as appropriate. No adjustment for multiple comparisons was performed; **Bolded** p-values are significant at the  $p < 0.05$  level.

**Supplementary Table 2.** Association of variables available within 24 hours of ICU admission and day-28 mortality by univariable logistic regression analysis in patients with Omicron infection

|                                                                     |                               | Day-28 survivors<br>N=96 | Day-28 non-<br>survivors<br>N=52 | OR (CI95%)        | p-value       |
|---------------------------------------------------------------------|-------------------------------|--------------------------|----------------------------------|-------------------|---------------|
| <b>Demographics and comorbidities</b>                               |                               |                          |                                  |                   |               |
| Sex, females                                                        |                               | 30 (31.25%)              | 12 (23.08%)                      | 0.66 (0.30;1.43)  | 0.294         |
| Age, years                                                          |                               | 62.02 ( $\pm$ 11.33)     | 67.28 ( $\pm$ 8.73)              | 1.05 (1.02;1.09)  | <b>0.006</b>  |
| Diabetes                                                            |                               | 27 (28.13%)              | 24 (47.06%)                      | 2.27 (1.12;4.61)  | <b>0.023</b>  |
| Obesity                                                             |                               | 35 (37.23%)              | 16 (30.77%)                      | 0.75 (0.36;1.54)  | 0.433         |
| Chronic heart failure                                               |                               | 6 (6.25%)                | 9 (17.31%)                       | 3.14 (1.05;9.38)  | <b>0.041</b>  |
| Hypertension                                                        |                               | 48 (50.00%)              | 28 (53.85%)                      | 1.17 (0.59;2.29)  | 0.655         |
| Chronic respiratory failure                                         |                               | 12 (12.50%)              | 7 (13.46%)                       | 1.09 (0.40;2.96)  | 0.867         |
| Chronic renal failure                                               |                               | 17 (17.89%)              | 17 (33.33%)                      | 2.29 (1.05;5.02)  | <b>0.038</b>  |
| Cirrhosis                                                           |                               | 2 (2.08%)                | 1 (1.92%)                        | 0.92 (0.08;10.41) | 0.947         |
| Immunosuppression                                                   |                               | 34 (35.42%)              | 30 (57.69%)                      | 2.49 (1.25;4.96)  | <b>0.010</b>  |
| Immunosuppression (3 cat.)                                          | None                          | 62 (64.58%)              | 22 (42.31%)                      | 1(ref)            | 0.063         |
|                                                                     | Solid organ transplant        | 17 (17.71%)              | 15 (28.85%)                      | 2.49 (1.07;5.80)  | <b>0.035</b>  |
|                                                                     | Onco-hematological malignan   | 9 (9.38%)                | 10 (19.23%)                      | 3.13 (1.13;8.71)  | <b>0.029</b>  |
|                                                                     | Others <sup>a</sup>           | 8 (8.33%)                | 5 (9.62%)                        | 1.76 (0.52;5.96)  | 0.363         |
| Number of comorbidities                                             |                               | 2 (1;3)                  | 2.50 (1;3.5)                     | 1.46 (1.12;1.91)  | <b>0.005</b>  |
| Clinical frailty scale                                              |                               | 3 (2;4)                  | 3 (3;4)                          | 1.40 (1.10;1.80)  | <b>0.007</b>  |
| <b>SARS-CoV-2 infection and Vaccination</b>                         |                               |                          |                                  |                   |               |
| Omicron - variant                                                   | Omicron - BA.1.1, BA.1 ou B.1 | 68 (80.95%)              | 41 (89.13%)                      | 1(ref)            | 0.231         |
|                                                                     | Omicron - BA.2                | 16 (19.05%)              | 5 (10.87%)                       | 0.52 (0.18;1.52)  | 0.231         |
| Previous SARS-CoV-2 infection                                       |                               | 3 (3.16%)                | 3 (5.77%)                        | 1.88 (0.37;9.65)  | 0.451         |
| SARS-CoV-2 vaccination (binaire)                                    |                               | 52 (54.17%)              | 37 (71.15%)                      | 2.09 (1.01;4.30)  | <b>0.046</b>  |
| Number of doses among vaccinated                                    |                               | 3 (2;3)                  | 3 (2;3)                          | 0.84 (0.39;1.82)  | 0.660         |
| 1st dose - ICU admission <sup>b</sup> , days                        |                               | 17 (17;17)               | 307 (307;307)                    |                   |               |
| 2nd dose - ICU admission <sup>b</sup> , days                        |                               | 157 (57;211)             | 169 (125;241)                    | 1.00 (0.99;1.01)  | 0.761         |
| 3rd dose - ICU admission <sup>b</sup> , days                        |                               | 154.5 (81.5;231.5)       | 100 (48;179)                     | 1.00 (0.99;1.00)  | 0.291         |
| Last dose - ICU admission <sup>b</sup> , days                       |                               | 157 (70;217)             | 146 (49;202)                     | 1.00 (0.99;1.00)  | 0.563         |
| SARS-CoV-2 serology at ICU ad                                       | Unavailable                   | 41 (42.71%)              | 20 (38.46%)                      | 1(ref)            | 0.844         |
|                                                                     | Negative                      | 31 (32.29%)              | 17 (32.69%)                      | 1.12 (0.51;2.50)  | 0.774         |
|                                                                     | Positive                      | 24 (25.00%)              | 15 (28.85%)                      | 1.28 (0.55;2.96)  | 0.562         |
| First symptoms - ICU admission, days                                |                               | 7 (5;10)                 | 7 (4;11)                         | 1.01 (0.95;1.07)  | 0.838         |
| SARS-CoV-2 RNA detection in nasopharyngeal swabs, Ct                |                               | 25 (20;27)               | 20 (18;24)                       | 0.83 (0.74;0.93)  | <b>0.0008</b> |
| <b>Patients severity upon ICU admission and biological features</b> |                               |                          |                                  |                   |               |
| WHO 10-point scale                                                  |                               | 6 (6;6)                  | 6 (6;7.5)                        | 1.13 (0.81;1.58)  | 0.466         |
| SAPS II score                                                       |                               | 33 (27;41)               | 42 (32;52)                       | 1.06 (1.03;1.09)  | <b>0.0003</b> |
| SOFA score                                                          |                               | 4 (3;6)                  | 6 (4;7)                          | 1.25 (1.09;1.44)  | <b>0.002</b>  |
| PaO <sub>2</sub> /FiO <sub>2</sub> ratio, mmHg                      |                               | 124 (86;178)             | 89 (70;120)                      | 0.99 (0.98;1.00)  | <b>0.005</b>  |
| Arterial lactate level, mM                                          |                               | 1.50 (1.10;2)            | 2 (1;2.50)                       | 1.13 (0.91;1.40)  | 0.268         |
| Blood leukocytes, G/L                                               |                               | 7.70 (5.05;11.45)        | 8.20 (4.35;13.05)                | 1.04 (0.99;1.09)  | 0.162         |
| Blood lymphocytes, G/L                                              |                               | 0.50 (0.40;0.80)         | 0.40 (0.20;0.70)                 | 1.04 (0.96;1.13)  | 0.353         |
| Blood platelets, G/L                                                |                               | 203 (157.50;291)         | 154.50 (114;244)                 | 0.99 (0.99;1.00)  | <b>0.009</b>  |
| Serum urea level, mM                                                |                               | 8 (5;13.5)               | 12.50 (8;21.5)                   | 1.04 (1.01;1.08)  | <b>0.014</b>  |
| Serum creatinine level, $\mu$ M                                     |                               | 89 (63;132)              | 110.50 (80.50;191.5)             | 1.00 (1.00;1.01)  | 0.100         |
| Bacterial coinfection                                               |                               | 10 (10.42%)              | 11 (21.15%)                      | 2.31 (0.91;5.87)  | 0.079         |
| Pulmonary embolism                                                  |                               | 4 (4.26%)                | 5 (9.62%)                        | 2.39 (0.61;9.34)  | 0.209         |
| Lung parenchyma involvement, %                                      |                               | 50 (45;75)               | 50 (40;75)                       | 1.00 (0.98;1.02)  | 0.873         |
| Oxygen/ventilatory support                                          | Oxygen                        | 18 (18.75%)              | 9 (17.31%)                       | 1(ref)            | 0.612         |
|                                                                     | High flow oxygen              | 51 (53.13%)              | 25 (48.08%)                      | 0.98 (0.39;2.49)  | 0.967         |
|                                                                     | NIV/C-PAP                     | 10 (10.42%)              | 4 (7.69%)                        | 0.80 (0.20;3.27)  | 0.756         |
|                                                                     | Invasive MV                   | 17 (17.71%)              | 14 (26.92%)                      | 1.65 (0.57;4.79)  | 0.360         |
| ECMO                                                                |                               | 1 (1.05%)                | 1 (1.92%)                        | 1.84 (0.11;30.09) | 0.668         |
| Vasopressor support                                                 |                               | 8 (8.79%)                | 11 (21.57%)                      | 2.85 (1.06;7.65)  | <b>0.037</b>  |

Results are N(%), means ( $\pm$ standard deviation) or medians (interquartile range, i.e., quartile 1;quartile 3). <sup>a</sup>includes HIV infection, long-term corticosteroid treatment, and other immunosuppressive treatments; <sup>b</sup>time lag between the last vaccination dose and ICU admission; <sup>c</sup>defined as <30 Binding Antibody Units (BAU)/mL; ICU: intensive care unit; Ct: cycle threshold; WHO: World Health Organization; SOFA: Sequential Organ Failure Assessment; SAPS II: Simplified Acute Physiology Score II; NIV: non-invasive ventilation; C-PAP; Continuous-positive airway pressure; MV: mechanical ventilation; ECMO: extracorporeal mechanical ventilation; Two-tailed p-values come from unadjusted comparisons using Chi square or Fisher's

exact tests for categorical variables, and t-tests or Mann-Whitney tests for continuous variables, as appropriate. No adjustment for multiple comparisons was performed; **Bolded** p-values are significant at the  $p < 0.05$  level.

**Supplementary Table 3.** Independent predictors of day-28 mortality available within 24 hours after ICU admission by multivariable logistic regression analysis in patients infected with variant Omicron (n=130).

|                        |                        | <b>aOR (CI 95%)</b> | <b>p-value</b> |
|------------------------|------------------------|---------------------|----------------|
| Age, years             |                        | 1.06 (1.01;1.11)    | <b>0.030</b>   |
| SOFA score             |                        | 1.29 (1.09;1.53)    | <b>0.004</b>   |
| Omicron - variant      | Omicron - BA.1, BA.1.1 | 1(ref)              |                |
|                        | Omicron - BA.2         | 0.35 (0.10;1.18)    | 0.091          |
| Chronic heart failure  |                        | 9.40 (1.92;46.10)   | <b>0.006</b>   |
| Diabetes               |                        | 2.44 (1.00;5.93)    | <b>0.049</b>   |
| Sex, females           |                        | 0.51 (0.18;1.44)    | 0.202          |
| Immunosuppression      |                        | 1.64 (0.59;4.56)    | 0.343          |
| SARS-CoV-2 vaccination |                        | 1.65 (0.56;4.86)    | 0.361          |

aOR (CI 95%): adjusted Odds Ratio (95% confidence interval) ; SOFA: Sequential Organ Failure Assessment; p-values come from multivariable logistic regression models; **Bolded** p-values are significant at the p<0.05 level.

**Supplementary Table 4.** Comparison of patients with severe SARS-CoV-2 infection at the time of ICU admission according to SARS-CoV-2 Omicron identified variants (N=130)

|                                                                            |                                 | Omicron - BA.1,<br>BA.1.1<br>N=109 | Omicron -<br>BA.2<br>N=21 | p-value      |
|----------------------------------------------------------------------------|---------------------------------|------------------------------------|---------------------------|--------------|
| <b><i>Demographics and comorbidities</i></b>                               |                                 |                                    |                           |              |
| Sex, females                                                               |                                 | 32 (29.36%)                        | 5 (23.81%)                | 0,606        |
| Age, years                                                                 |                                 | 64.3 (±10.6)                       | 64.4 (±9.1)               | 0,941        |
| Diabetes                                                                   |                                 | 42 (38.89%)                        | 7 (33.33%)                | 0,631        |
| Obesity                                                                    |                                 | 36 (33.33%)                        | 6 (30.00%)                | 0,771        |
| Chronic heart failure                                                      |                                 | 12 (11.01%)                        | 2 (9.52%)                 | 0,841        |
| Hypertension                                                               |                                 | 58 (53.21%)                        | 12 (57.14%)               | 0,741        |
| Chronic respiratory failure                                                |                                 | 6 (5.50%)                          | 8 (38.10%)                | <b>0,000</b> |
| Chronic renal failure                                                      |                                 | 28 (26.17%)                        | 5 (23.81%)                | 0,821        |
| Cirrhosis                                                                  |                                 | 2 (1.83%)                          | 0 (0.00%)                 | 0,532        |
| Immunosuppression                                                          |                                 | 46 (42.20%)                        | 12 (57.14%)               | 0,207        |
| Immunosuppression (3 cat.)                                                 |                                 |                                    |                           |              |
|                                                                            | None                            | 63 (57.80%)                        | 9 (42.86%)                | 0,257        |
|                                                                            | Solid organ transplant          | 25 (22.94%)                        | 6 (28.57%)                |              |
|                                                                            | Onco-hematological malignancies | 11 (10.09%)                        | 5 (23.81%)                |              |
|                                                                            | Others <sup>a</sup>             | 10 (9.17%)                         | 1 (4.76%)                 |              |
| Number of comorbidities                                                    |                                 | 2 (1;3)                            | 2 (2;3)                   | 0,193        |
| Clinical frailty scale                                                     |                                 | 3 (3;4)                            | 3 (3;4)                   | 0,489        |
| <b><i>SARS-CoV-2 infection and Vaccination</i></b>                         |                                 |                                    |                           |              |
| Previous SARS-CoV-2 infection                                              |                                 | 4 (3.70%)                          | 1 (4.76%)                 | 0,818        |
| SARS-CoV-2 vaccination                                                     |                                 | 64 (58.72%)                        | 18 (85.71%)               | <b>0,019</b> |
| Number of doses among vaccinated                                           |                                 | 3 (2;3)                            | 3 (3;3)                   | 0,059        |
| 1st dose - ICU admission <sup>b</sup> , days                               |                                 | 162 (17;307)                       | .                         |              |
| 2nd dose - ICU admission <sup>b</sup> , days                               |                                 | 174 (97;226)                       | .                         |              |
| 3rd dose - ICU admission <sup>b</sup> , days                               |                                 | 134 (48;217)                       | 153 (144;163)             | 0,929        |
| Last dose - ICU admission <sup>b</sup> , days                              |                                 | 157 (57;241)                       | 153 (144;163)             | 0,908        |
| SARS-CoV-2 serology at ICU admission                                       |                                 |                                    |                           |              |
|                                                                            | Unavailable                     | 46 (42.20%)                        | 7 (33.33%)                | <b>0,016</b> |
|                                                                            | Negative                        | 38 (34.86%)                        | 3 (14.29%)                |              |
|                                                                            | Positive                        | 25 (22.94%)                        | 11 (52.38%)               |              |
| First symptoms - ICU admission, days                                       |                                 | 7 (5;10)                           | 7 (3;11)                  | 0,505        |
| SARS-CoV-2 RNA detection in nasopharyngeal swabs, Ct                       |                                 | 22 (19;26)                         | 19 (18;22)                | 0,085        |
| <b><i>Patients severity upon ICU admission and biological features</i></b> |                                 |                                    |                           |              |
| WHO 10-point scale                                                         |                                 | 6 (6;6)                            | 6 (6;8)                   | 0,205        |
| SAPS II score                                                              |                                 | 34 (27;45)                         | 39 (33;42)                | 0,192        |
| SOFA score                                                                 |                                 | 4 (3;6)                            | 5 (4;7)                   | 0,259        |
| PaO <sub>2</sub> /FiO <sub>2</sub> ratio, mmHg                             |                                 | 103 (76;142)                       | 145 (111;170)             | <b>0,017</b> |
| Arterial lactate level, mM                                                 |                                 | 1.6 (1.1;2.1)                      | 1.5 (1.0;2.4)             | 0,903        |
| Blood leukocytes, G/L                                                      |                                 | 7.7 (4.8;11.3)                     | 10.0 (4.1;17.5)           | 0,239        |
| Blood lymphocytes, G/L                                                     |                                 | 0.5 (0.3;0.8)                      | 0.4 (0.2;0.6)             | 0,316        |
| Blood platelets, G/L                                                       |                                 | 198 (141;284)                      | 146 (111;220)             | <b>0,028</b> |
| Serum urea level, mM                                                       |                                 | 9 (6;16)                           | 12 (7;17)                 | 0,226        |
| Serum creatinine level, μM                                                 |                                 | 94 (67;158)                        | 110 (88;177)              | 0,237        |
| Bacterial coinfection                                                      |                                 | 13 (11.93%)                        | 6 (28.57%)                | <b>0,048</b> |

|                                                       |                          |              |             |              |
|-------------------------------------------------------|--------------------------|--------------|-------------|--------------|
| Pulmonary embolism                                    |                          | 7 (6.54%)    | 1 (4.76%)   | 0,758        |
| Lung parenchyma involvement, %                        |                          | 50 (40;75)   | 62 (43;75)  | 0,722        |
| Oxygen/ventilatory support                            | Oxygen                   | 22 (20.18%)  | 4 (19.05%)  | 0,512        |
|                                                       | High flow oxygen         | 57 (52.29%)  | 8 (38.10%)  |              |
|                                                       | NIV/C-PAP                | 8 (7.34%)    | 3 (14.29%)  |              |
|                                                       | Invasive MV              | 22 (20.18%)  | 6 (28.57%)  |              |
| ECMO                                                  |                          | 1 (0.92%)    | 1 (4.76%)   | 0,190        |
| Vasopressor support                                   |                          | 14 (13.46%)  | 4 (19.05%)  | 0,000        |
| <b><i>Management and outcomes during ICU stay</i></b> |                          |              |             |              |
| Invasive MV                                           |                          | 53 (48.62%)  | 9 (42.86%)  | 0.628        |
| Prone positioning                                     |                          | 40 (40.40%)  | 6 (30.00%)  | 0.457        |
| MV duration, days                                     |                          | 16 (7;23)    | 9 (4;14)    | 0.073        |
| ECMO support                                          |                          | 8 (7.34%)    | 1 (4.76%)   | 1.000        |
| Duration of ECMO, days                                |                          | 8 (8;25)     | -           | -            |
| Vasopressor support                                   |                          | 50 (43.30%)  | 5 (23.81%)  | 0.057        |
| Duration of vasopressors, days                        |                          | 5 (1;13)     | 4 (2;10)    | 0.563        |
| Renal Replacement Therapy                             |                          | 21 (19.27%)  | 2 (9.52%)   | 0.365        |
| Ventilator-acquired pneumonia                         |                          | 35 (32.71%)  | 3 (14.29%)  | 0.119        |
| Ventilator-acquired pneumonia (among IMV)             |                          | 35 (68.63%)  | 3 (33.33%)  | 0.063        |
| CAPA                                                  |                          | 4 (3.74%)    | 2 (9.52%)   | 0.255        |
| Dexamethasone                                         |                          | 91 (89.22%)  | 15 (71.43%) | <b>0.031</b> |
| Tocilizumab                                           |                          | 41 (40.20%)  | 3 (14.29%)  | <b>0.026</b> |
| Monoclonal antibodies                                 |                          | 20 (20.00%)  | 3 (14.29%)  | 0.762        |
|                                                       | Casirivimab - Imdevimab  | 20 (100.00%) | 3 (100.00%) | -            |
|                                                       | Tixagevimab - Cilgavimab | 16 (80.00%)  | 3 (100.00%) | 1.000        |
|                                                       | Sotrovimab               | 4 (20.00%)   | 0 (0.00%)   | 1.000        |
| Day-28 mortality                                      |                          | 41 (37.61%)  | 5 (23.81%)  | 0.230        |

Results are N (%), means ( $\pm$ standard deviation) or medians (interquartile range, *i.e.*, *quartile 1;quartile 3*). <sup>a</sup>includes HIV infection, long-term corticosteroid treatment, and other immunosuppressive treatments; <sup>b</sup>time lag between the last vaccination dose and ICU admission; <sup>c</sup>defined as <30 Binding Antibody Units (BAU)/mL; ICU: intensive care unit; Ct: cycle threshold; WHO: World Health Organization; SOFA: Sequential Organ Failure Assessment; SAPS II: Simplified Acute Physiology Score II; NIV: non-invasive ventilation; C-PAP; Continuous-positive airway pressure; MV: mechanical ventilation; ECMO: extracorporeal mechanical ventilation; Two-tailed p-values come from unadjusted comparisons using Chi square or Fisher's exact tests for categorical variables, and t-tests or Mann-Whitney tests for continuous variables, as appropriate. No adjustment for multiple comparisons was performed; **Bolded** p-values are significant at the p<0.05 level.
